# Supplementary material for: What is the Optimal Timing to Assess the Effect of 5-ASA in Patients with Mild-to- Moderate Ulcerative Colitis? A Single-Center Prospective Observational Study
Source: Research Square preprint supplement (doi:10.21203/rs.3.rs-7873738/v1), 2025-12-10
Supplement: Supplementary file 1 [file 88f2017332014d60871d15b6.docx]

**Supplementary Data**

| **Table S1. Baseline characteristics (laboratory test)** | | | | |
| --- | --- | --- | --- | --- |
|  | **W4**  **(N=41)** | **W8**  **(N=40)** | **W12**  **(N=42)** | **P-value** |
| **ESR (mm/h）** | 8 (6, 10) | 7 (4, 12) | 8 (6, 12) | 0.589 |
| **hs-CRP (mg/L)** | 0.797  (0.787, 1.535) | 1.020  (0.797, 1.575) | 0.797  (0.797, 1.380) | 0.840 |
| **FOB** | 100% | 100% | 100% |  |
| **Routine Blood Test** |  |  |  |  |
| RBC (1012/L) | 4.36±0.70 | 4.60±0.54 | 4.76±0.48 | 0.058 |
| HGB (g/L) | 131.00±19.55 | 137.55±16.02 | 139.77±18.33 | 0.249 |
| HCT (%) | 39.72±5.84 | 42.04±4.32 | 42.83±4.75 | 0.098 |
| MCV (fL) | 91.34±4.19 | 91.54±4.23 | 89.94±5.28 | 0.336 |
| MCH (pg) | 30.03±1.20 | 29.93±1.76 | 29.28±2.26 | 0.271 |
| WBC (1012/L) | 4.8 (4.04, 6.51) | 5.76 (4.69, 7.21) | 5.48 (4.58, 6.24) | 0.247 |
| NEUT (1012/L) | 2.86 (2.08, 3.55) | 3.23 (2.47, 4.71) | 3.205 (2.54, 3.80) | 0.236 |
| EOS (1012/L) | 0.12 (0.07, 0.21) | 0.11 (0.07, 0.19) | 0.085 (0.04, 0.17) | 0.326 |
| BASO (1012/L) | 0.02 (0.02, 0.06) | 0.03 (0.02, 0.05) | 0.03 (0.02, 0.03) | 0.197 |
| LYMPH (1012/L) | 1.82 (1.38, 2.07) | 1.56 (1.42, 2.012） | 1.74 (1.36, 2.07) | 0.932 |
| MONO (1012/L) | 0.33 (0.27, 0.47) | 0.41 (0.32, 0.55) | 0.34 (0.28, 0.44) | 0.295 |
| Platelets (1012/L) | 232 (159.25, 298) | 260 (200.5, 292) | 216 (188, 263) | 0.554 |
| **Liver Function Test** |  |  |  |  |
| ALB (g/L) | 46.08±2.99 | 45.60±3.51 | 45.89±3.26 | 0.905 |
| ALT (U/L) | 17 (12, 29) | 19 (13.5, 21.5) | 17.5 (12, 25.25) | 0.948 |
| AST (U/L) | 20 (16, 26) | 19.5 (16, 22.75) | 19 (16.5, 21.5) | 0.863 |
| Tbil (μmol/L) | 11.3 (8.20, 16.20) | 14.0 (9.31, 18.65) | 13.8 (9.31, 15.70) | 0.222 |
| Dbil (μmol/L) | 3.9 (3.1, 5.2) | 3.9 (3.25, 5.8) | 4.05 (3, 4.8) | 0.819 |
| Ibil (μmol/L) | 6.7 (5.4, 11) | 10 (7.13, 12.5) | 9.15 (6.75, 10.83) | 0.049 |
| ALP (U/L) | 82 (70, 87.25) | 77 (69, 106) | 77 (63.5, 88.5) | 0.688 |
| TP (g/L) | 76.5 (72.5, 80.3) | 73.3 (69.35, 79.85) | 74.6 (71.8, 77.6) | 0.420 |
| **Renal Function Test** |  |  |  |  |
| Urea (mmol/L) | 4.34 (3.51, 5.05) | 4.64 (3.51, 4.97) | 4.63 (3.79, 5.94) | 0.605 |
| Cr (μmol/L) | 58 (50.5, 64.5) | 58 (47, 69.75) | 62 (50.5, 78.5) | 0.453 |

**Alt text:** Baseline characteristics table confirming comparable laboratory test across follow-up timing groups.
